# Supplementary material
Source: PubMed Central journal article supplement (PMC4581904)
Supplement: NIHMS684887-supplement.pdf [file NIHMS684887-supplement.pdf]

Table 1. Summary of Cases: Clinical Features, Exam, Laboratory and Biopsy Findings

| Case | Gender, Age (yrs) | Clinical Features                                                                                                                   | Visual Acuity: OD; OS | Exam on Presentation                                                                  | ESR    | CRP                   | Steroids before Biopsy        | VZV Antigen in TA |
|------|-------------------|-------------------------------------------------------------------------------------------------------------------------------------|-----------------------|---------------------------------------------------------------------------------------|--------|-----------------------|-------------------------------|-------------------|
| 1    | M, 79             | Jaw claudication, headache for 1 month, gradual weight loss; progressive painless vision loss                                       | NLP; CF @ 2'          | 3+ pallid disc edema OD; diffuse pallor, 2+ disc edema OS; AMD OS; APD OD             | Normal | 78 (normal <4.9)      | Prednisone PO for 3 days      | No                |
| 2    | F, 77             | Jaw claudication for 1 month; painless loss of peripheral vision OS                                                                 | 20/25-2; 20/30+2      | Normal OD; Mild disc edema OS, few cotton wool spots; APD OS                          | Normal | 25.9 (lab normal <10) | Solumedrol IV for 3 days      | Yes               |
| 3    | F, 53             | Vascular gliosis at optic disc; painless, acute loss of vision OS (first exam months after onset of symptoms)                       | 20/25+1; CF @ 5'      | Normal OD; diffuse disc pallor with gliosis OS; c/d 0.1/0.2; APD OS                   | 31     | Normal                | None                          | Yes               |
| 4    | F, 68             | Polymyalgia rheumatica; jaw tightness; chronic headaches; episodic diplopia; progressive decrease in vision OD with central scotoma | 20/150; 20/40         | Disc edema with RNFL hemorrhages OD; normal OS; APD OD                                | 79     | 14 (lab normal <1)    | Prednisone PO for 2 months    | Yes               |
| 5    | F, 84             | Sequential unilateral loss of vision 3 years apart                                                                                  | 20/100; CF @ 4'       | Pallid disc edema with RNFL hemorrhage OD; disc pallor OS; c/d 0.2/0.3; APD OS        | Normal | Normal                | Prednisone PO for 1 week      | Yes               |
| 6    | M, 63             | Sequential VF loss 2 years apart; left inferior VF defect; right superior VF defect                                                 | 20/25; 20/25;         | Disc edema/hemorrhages bilaterally OD>OS; subsequent subretinal hemorrhage OS; APD OS | Normal | Normal                | None                          | Yes               |
| 7    | M, 49             | Headache, eye pain; sequential unilateral vision loss 11 months apart                                                               | HM; 20/200            | Acute disc edema with hemorrhages; APD OD                                             | Normal | Normal                | IV steroids 11 months earlier | No                |

AMD = age-related macular degeneration; APD = afferent papillary defect; c/d = cup to disc ratio; CF = count finger; CRP = C-reactive protein; ESR = erythrocyte sedimentation rate; F = female; HM = hand motion; M = male, NLP = no light perception; OD = right eye; OS = left eye; RNFL = retinal nerve fiber layer; TA = temporal artery; VF = visual field.
